# Supplementary material for: Group A Streptococcus intranasal infection promotes CNS infiltration by streptococcal-specific Th17 cells
Source: JCI journal article supplement (doi:10.1172/jci80792), 2015-12-13
Supplement: sd1 [file 1]

1001

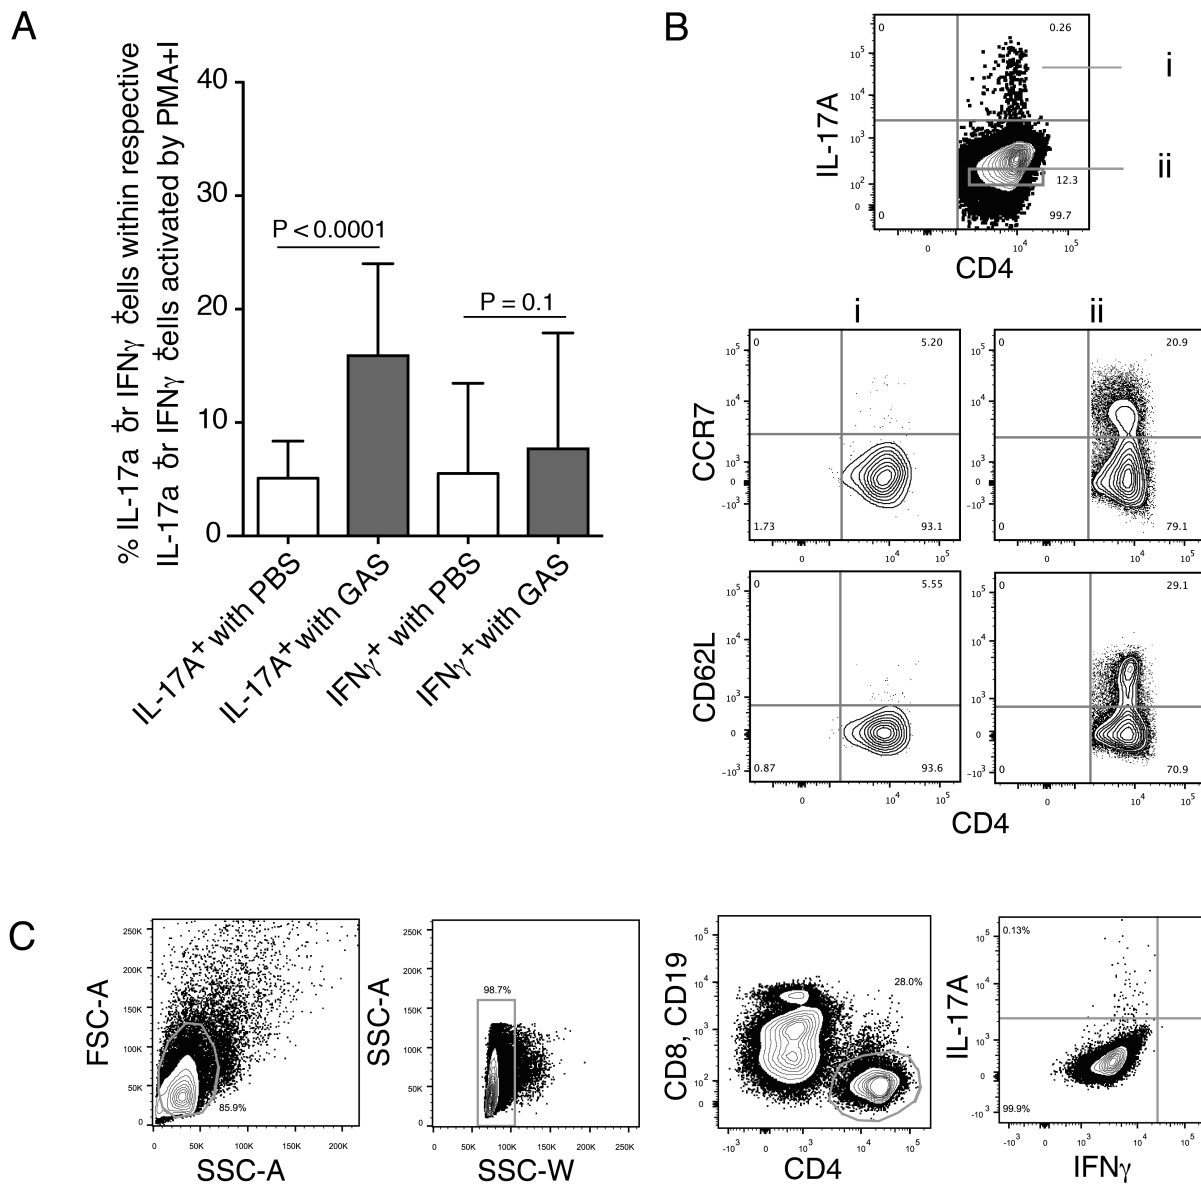

1002

1003

1004 **Supplemental Figure 1. GAS activation of IL-17A<sup>+</sup> or IFNγ<sup>+</sup> CD4<sup>+</sup> T cells expressed as a**  
 1005 **percentage of total cells that produce these signature cytokines with PMA+I activation. (A) Bar**  
 1006 **graph shows the percentage of T cells activated by PBS (control) or by HK-GAS. Single cell**  
 1007 **suspensions of tonsil tissue from 28 patients were incubated for 6 h with PBS (control), HK-GAS or**

1008 PMA+I prior to FACs analysis. Percentages shown on the Y axis were calculated from percentages of  
1009 IL-17A<sup>+</sup> or IFN $\gamma$ <sup>+</sup> CD4<sup>+</sup> cells that were activated by PBS or HK-GAS divided by percentages of IL-  
1010 17A<sup>+</sup> or IFN $\gamma$ <sup>+</sup> CD4<sup>+</sup> T cells, respectively, that were separately incubated with PMA+I as described in  
1011 the methods. Bar graph shows mean  $\pm$  s.e.m. Statistical significance of mean differences was assessed  
1012 by the Wilcoxon matched-pairs signed rank test; vertical lines indicated the upper 95% confidence  
1013 interval. Data were collected from >10 experiments. (B) FACS plots for HK-GAS-activated tonsil cells  
1014 stained for IL-17A, CD4, CCR7 and CD62L. Cells in Panel i were gated on IL-17A<sup>+</sup> CD4<sup>+</sup> T cells and  
1015 those in panel ii were gated on IL-17A<sup>-</sup> CD4<sup>+</sup> T cells. (C) FACS plots showing the gating strategy used  
1016 in Figure1 and Supplemental Figure 1.

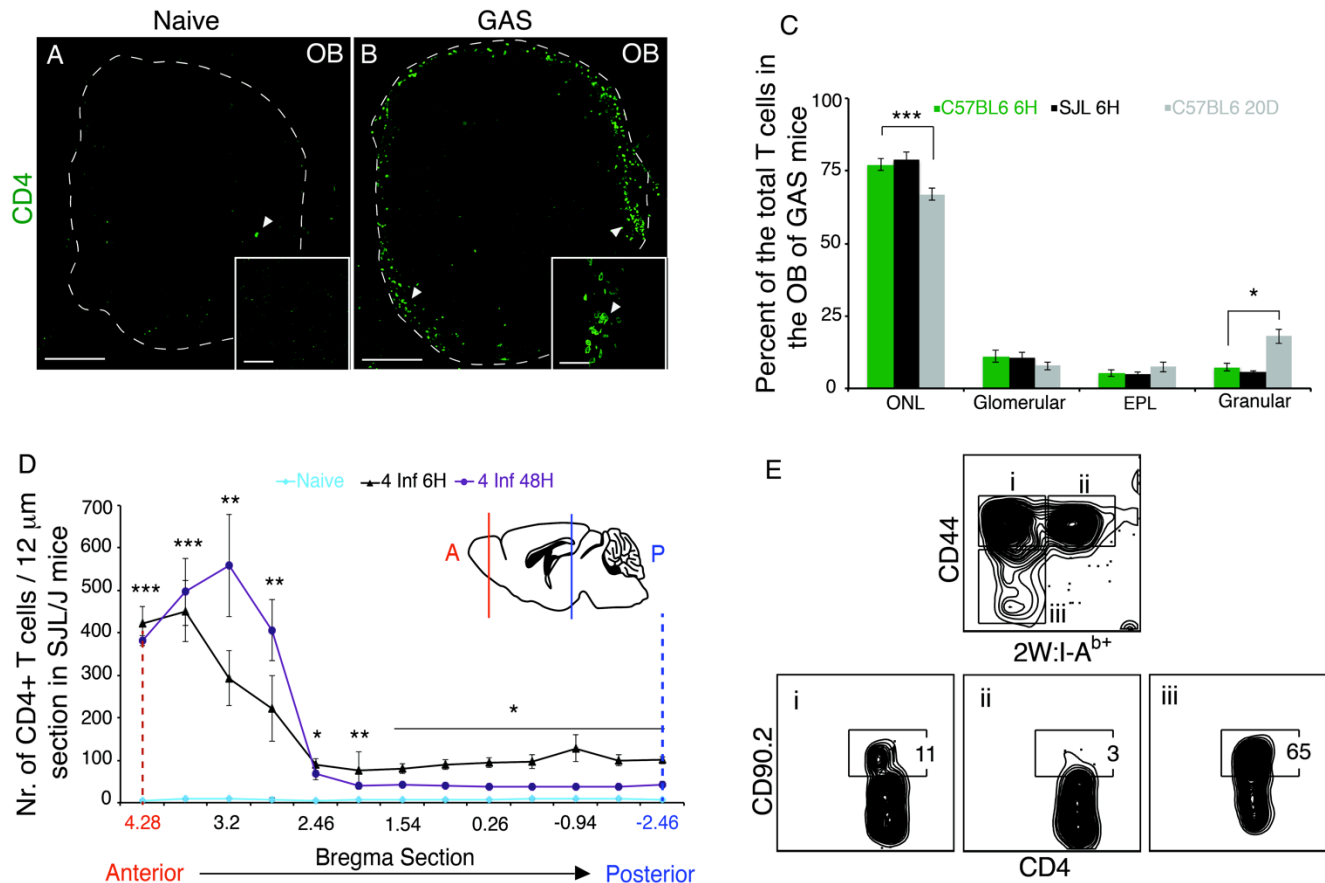

**Supplemental Figure 2. T cells initially populate the olfactory bulb and associate with the olfactory sensory axons.** (A, B) Lower magnification and inset (white box) of CD4<sup>+</sup> T cell (green) distribution in the OB from naive or multiply GAS-inoculated animals. Scale bars in lower magnifications are 250  $\mu$ m, whereas in the insets 15  $\mu$ m. (C) Bar graph of T cell distribution (Y axis) in various OB layers at 6h in multiply GAS-inoculated C57BL/6 (green bars) and SJL/J mice (black bars) and also 20 days (grey bar) after the last inoculation. Data were collected from n = 3-4 animals/group and presented as mean  $\pm$  s.e.m. (C) Line graph of CD4<sup>+</sup> T cell distribution along the anteroposterior axis of the brain in multiply inoculated-SJL/J mice at 6 h (black) and 48 h (purple) after the final inoculation, or in naive (aqua) animals. Data were collected from multiple sections from n = 3-4 animals per group and presented as mean  $\pm$  s.e.m. Statistical significance of \*p<0.05, \*\*p<0.001, \*\*\*p<0.0001; was assessed by either one-way ANOVA with Tukey's multiple post hoc comparison (C) or two way

1046 ANOVA with Bonferroni post-hoc correction (D). (E) Representative FACS plot from GAS-inoculated  
1047 mice showing the percentage of residual intravascular brain CD4<sup>+</sup> T cells that stain with anti-CD90.2  
1048 antibody injected i.v. a few minutes before sacrifice (see Materials and Methods for details). Lower  
1049 panels are brain-derived CD4<sup>+</sup> T cells gated on: i) CD44<sup>hi</sup> 2W:I-A<sup>b-</sup> ii) CD44<sup>hi</sup> 2W:I-A<sup>b+</sup> and iii)  
1050 CD44<sup>low</sup>.

1051

1052

1053

1054

1055

1056

1057

1058

1059

1060

1061

1062

1063

1064

1065

1066

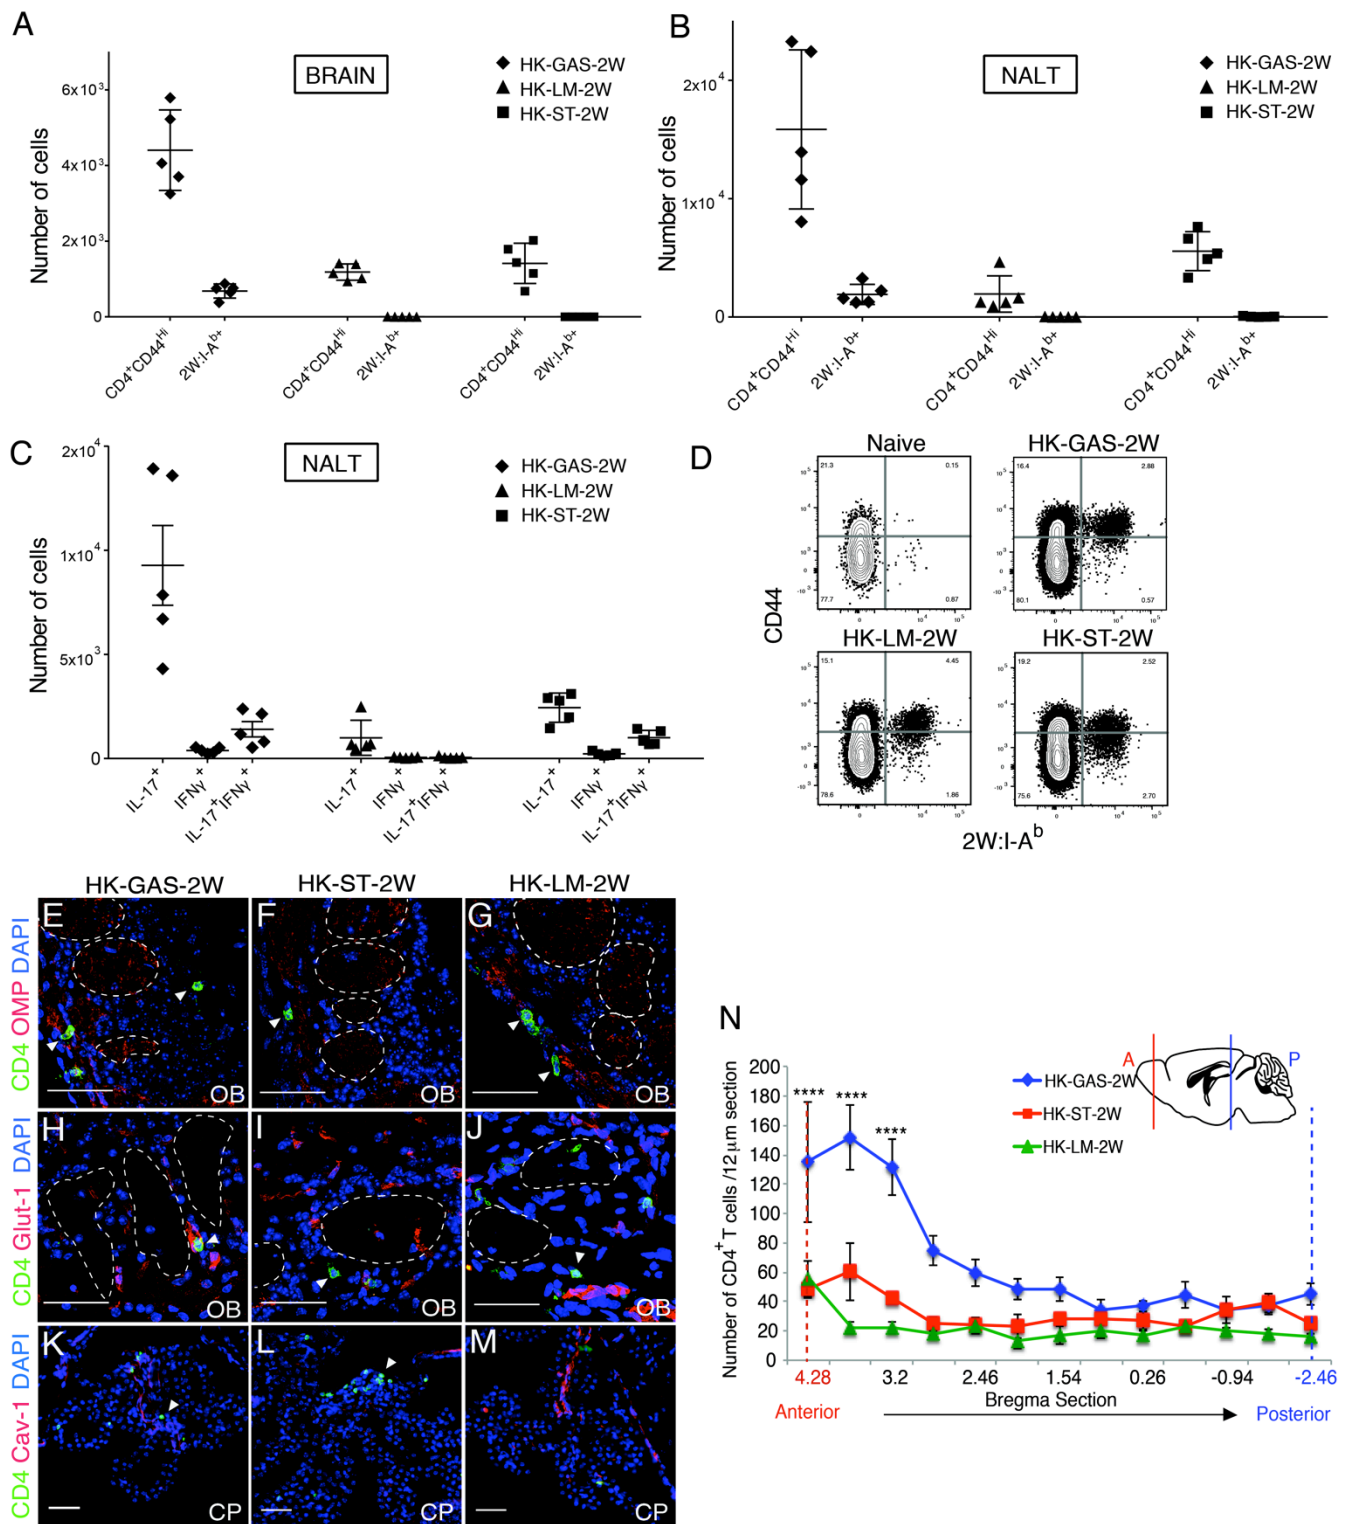

**Supplemental Figure 3. Contrary to GAS, multiple i.n. inoculations with *Listeria monocytogenes* or *Salmonella typhimurium* do not cause significant T cell migration into the brain.** (A) Scatter plot showing total numbers of either CD4<sup>+</sup>CD44<sup>Hi</sup> cells or 2W:I-A<sup>b+</sup> T cells isolated from brains of mice

1071 inoculated i.n. with  $2 \times 10^8$  CFU of heat-killed *Streptococcus pyogenes* (HK-GAS-2W), *Salmonella*  
1072 *typhimurium* (HK-ST-2W), or *Listeria monocytogenes* (HK-LM-2W) and analyzed by FACS. Scatter  
1073 plots showing total numbers of either  $CD4^+CD44^{hi}$  cells or  $2W:I-A^{b+}$  T cells (B) or IL-17<sup>+</sup>, IFN $\gamma$ <sup>+</sup> or IL-  
1074 17<sup>+</sup>IFN $\gamma$ <sup>+</sup> double positive  $CD4^+$  T cells (C) in the NALT of the above mice. The lines in the plots  
1075 represent mean  $\pm$  s.e.m. (D) FACS plot showing  $2W:I-A^{b+}CD4^+$  T cells (indicated by red arrows)  
1076 isolated from spleens of mice that were naïve or i.v. inoculated with  $2 \times 10^8$  CFU of HK-GAS-2W, HK-  
1077 LM-2W or HK-ST-2W (seven days after a single inoculation). A representative plot is shown per group  
1078 (n=2 per group). (E – M) Detection of  $CD4^+$  T cells in brains of mice inoculated i.n. with HK-GAS-2W,  
1079 HK-LM-2W or HK-ST-2W and analyzed by immunofluorescence from an independent experiment.  
1080  $CD4^+$  T cells associate with olfactory marker protein (OMP, E-G), Glut-1<sup>+</sup> blood vessels (H-J), and the  
1081 choroid plexus (CP, K-M). Scale bars = 50  $\mu$ m. (N) Line graph of  $CD4^+$  T cell distribution along the  
1082 anteroposterior axis after multiple inoculations with HK-GAS-2W (blue, n=5 mice), HK-ST-2W (red,  
1083 n=4 mice), or HK-LM-2W (green, n=4 mice). The X axis represents bregma sections, and Y axis the  
1084 number of  $CD4^+$  T cells per 12  $\mu$ m section. Red and blue lines (solid) indicate positions of brain regions  
1085 relative to the graph (dashed lines). Data are presented as mean  $\pm$  s.e.m; \*\*\*\*p<0.0001 for HK-GAS-  
1086 2W vs. HK-LM-2W and for HK-GAS-2W vs. HK-ST-2W by two-way ANOVA with Bonferroni post-  
1087 hoc correction.

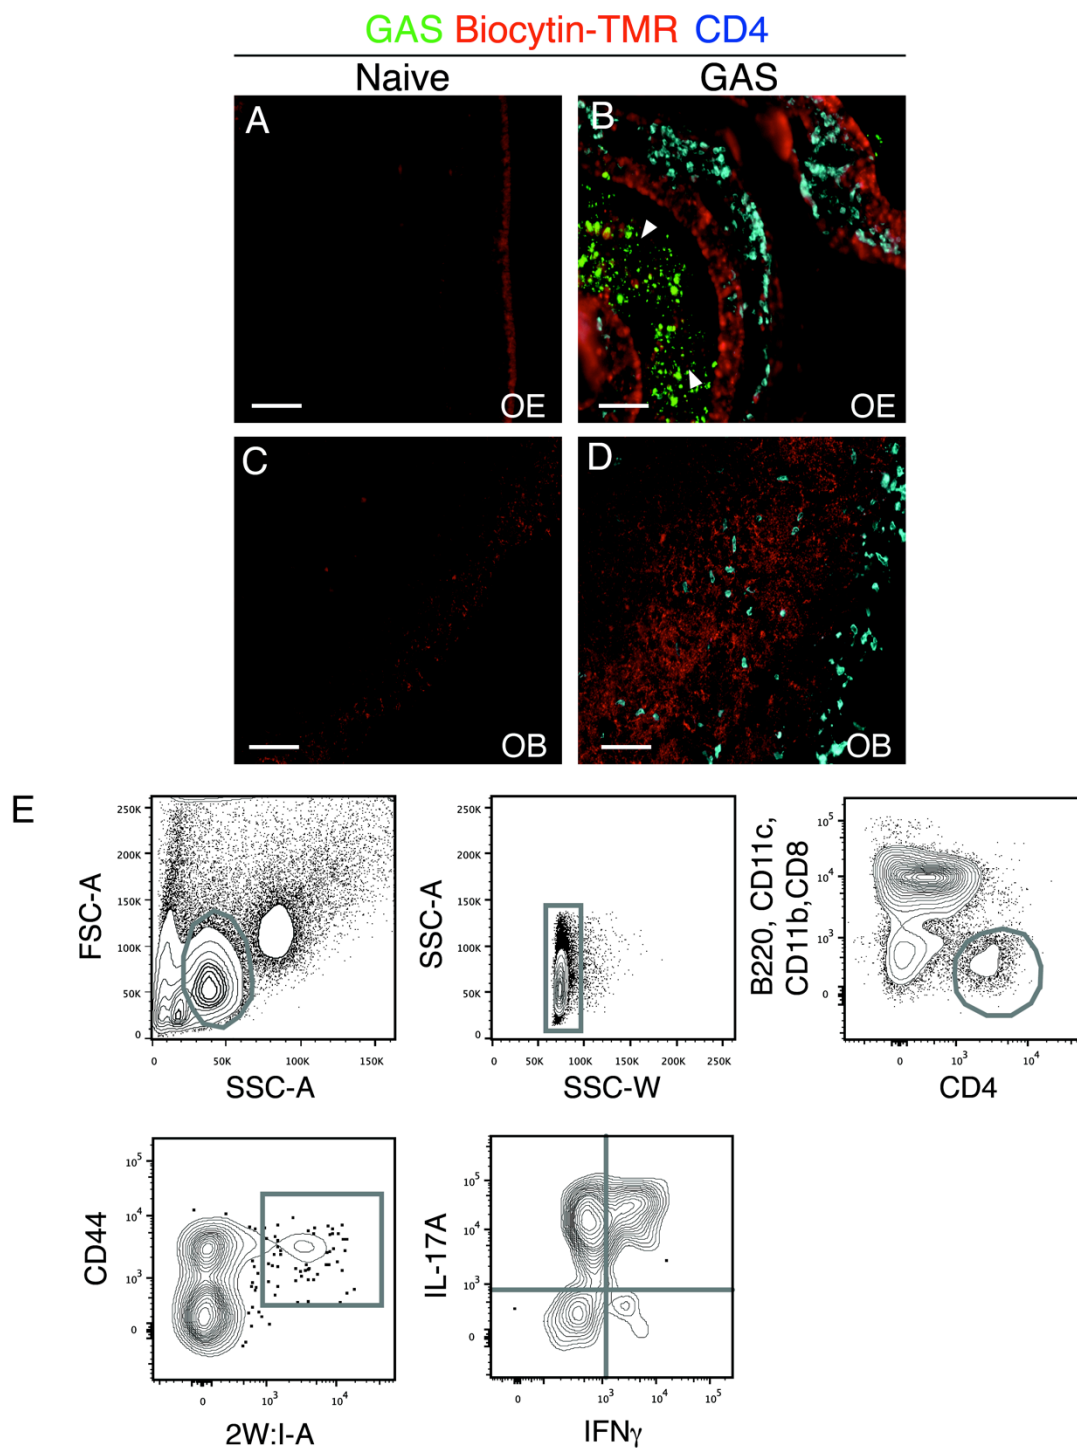

**Supplemental Figure 4. T cell migration into the brain does not require tissue infection.** (A-D) Immunofluorescence detection of streptococci (green), CD4<sup>+</sup> T cells (blue) and biocytin-TMR (red) in olfactory epithelia (OE, A, B) and olfactory bulb (OB, C,D) in 12  $\mu$ m sections from naive and GAS i.n.

1100 inoculated mice. Streptococci (green, white arrowheads) are labeled with a group A carbohydrate  
1101 antibody. Visualization of CD4<sup>+</sup> labels T cells (blue) and biocytin-TMR (red) indicates BBB leakage in  
1102 the OB (lower right panel). Scale bars (B) = 50  $\mu$ m. (C) FACS plots showing the gating strategy used in  
1103 Figures 2A, 2B and 3.

1104

1105

1106

1107

1108

1109

1110

1111

1112

1113

1114

1115

1116

1117

1118

1119

1120



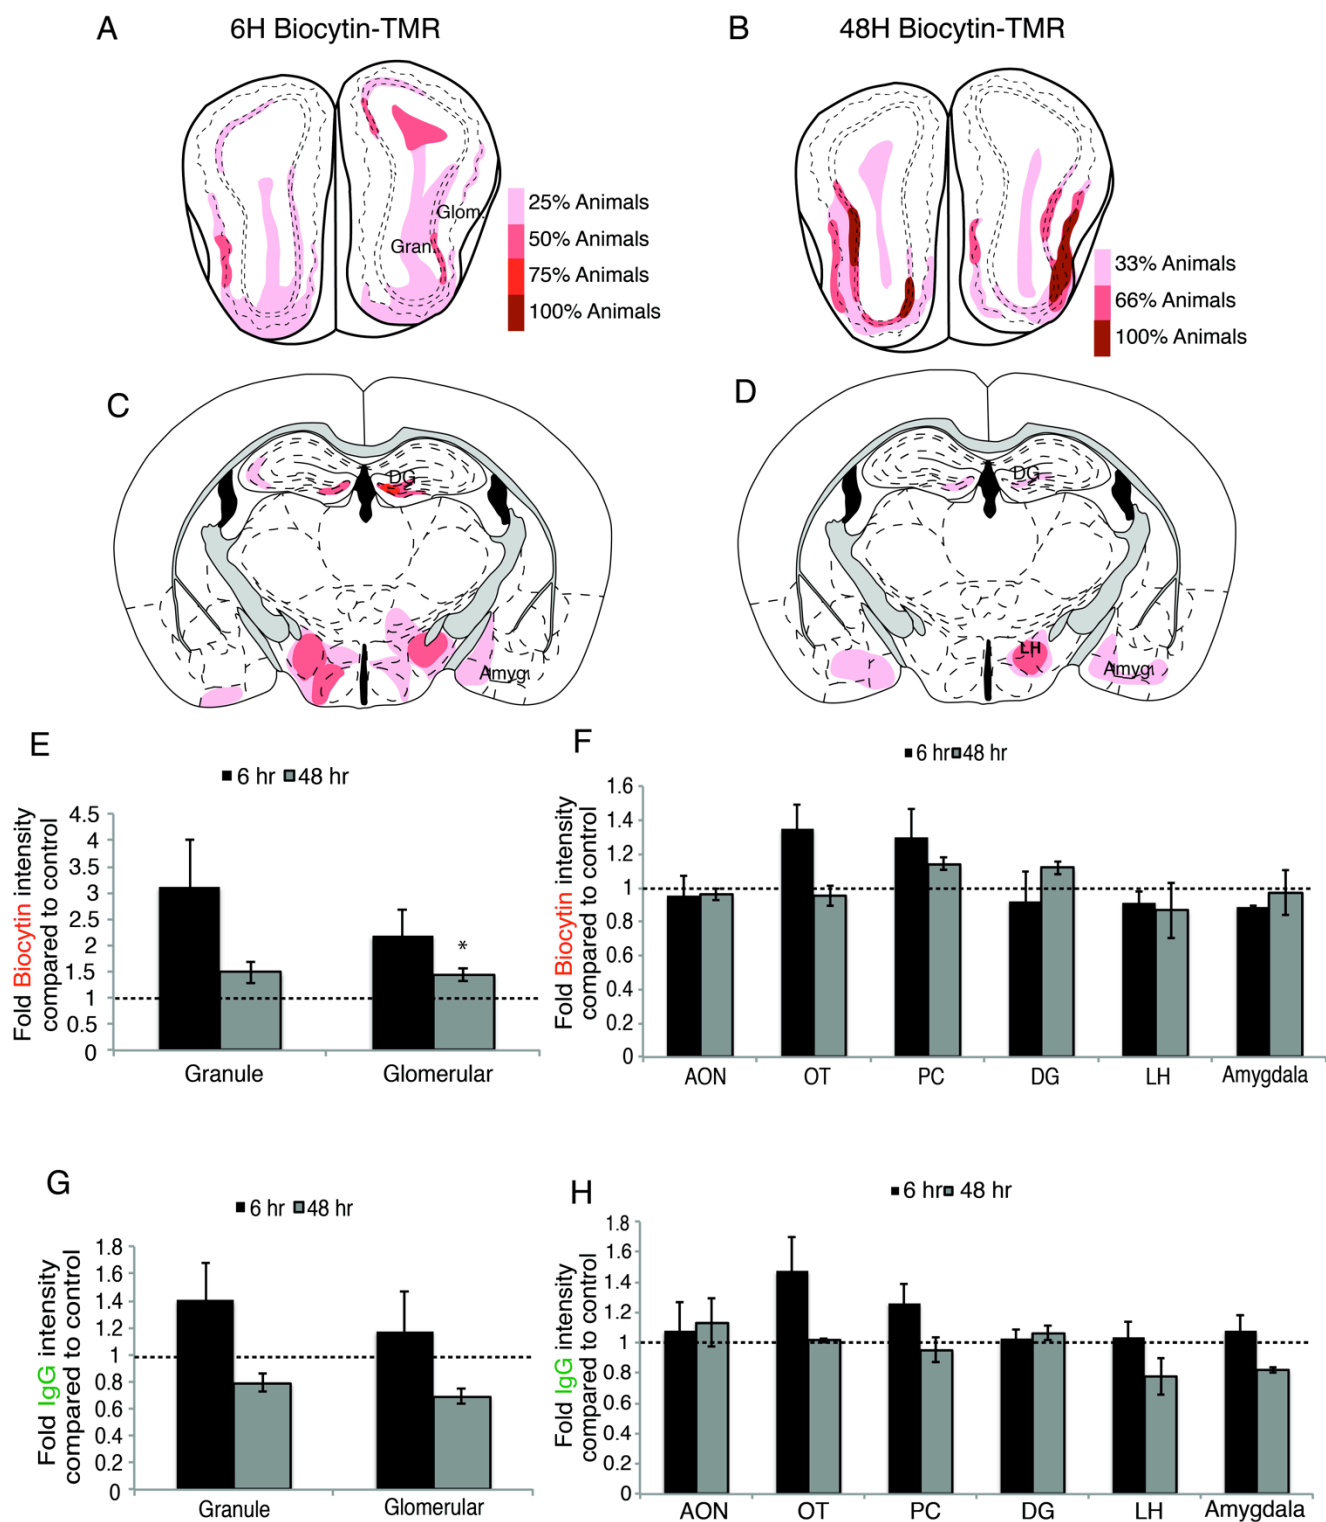

**Supplemental Figure 5. Minimal BBB leakage, but no serum IgG deposition is found in brains of mice following a single GAS infection.** (A-D) Heat maps of biocytin-TMR leakage in the OB (A, B) and posterior brain (C, D) in C57BL6/J mice after 6 or 48 h after one GAS inoculation, respectively.

1125 Red hues represent percentages of animals showing biocytin-TMR leakage in various brain regions, not  
1126 the intensity of tracer leakage observed among animals (see legend in A). (E-F) Bar graphs compare the  
1127 fold change in biocytin-TMR average intensity between singly GAS-inoculated and naive mice in either  
1128 the OB or other CNS regions [anterior olfactory nucleus (AON), olfactory tubercle (OT), piriform cortex  
1129 (PC) and dentate gyrus (DG), lateral hypothalamus (LH) and amygdala] at 6 h (black bars) and 48 h  
1130 (grey bars) after the inoculation. Data were collected from  $n = 3-4$  animals in two independent  
1131 experiments and presented as mean  $\pm$  s.e.m,  $*p < 0.05$ ; two-tailed Student's t-test. (G-H) Bar graphs  
1132 compare the fold change in IgG average intensities between singly GAS-inoculated and naive mice in  
1133 either the OB, or other CNS regions (H) at 6 h (black bars) and 48 h (grey bars) after the inoculation.  
1134 Data were collected from two independent experiments in  $n = 3-4$  animals and presented as mean  $\pm$   
1135 s.e.m,  $*p < 0.05$ ; two-tailed Student's t-test.

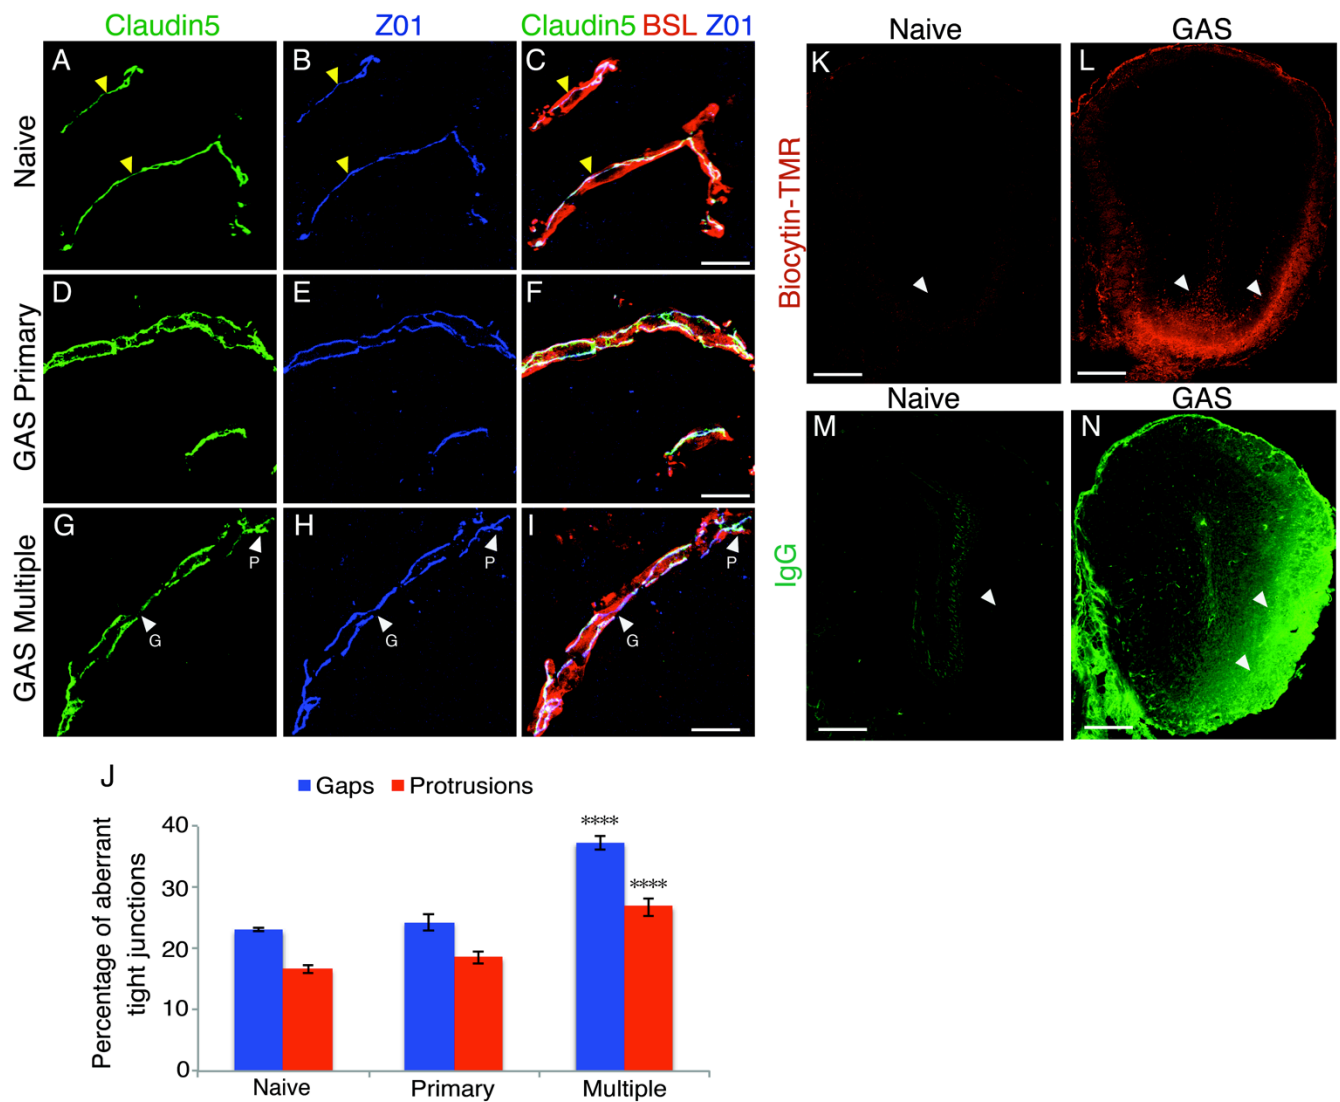

**Supplemental Figure 6. Brain homing of T cells induces endothelial cell tight junction abnormalities.** (A-I) Representative images of endothelial cell tight junctions (TJs) in the glomerular layer of the OB from naive, primary or multiply GAS-inoculated mice. TJs are labeled for Claudin-5 (A, D, G, green) and ZO1 (B, E, H, blue) and blood vessels labeled with BSL-rhodamine (C, F, I; red) in merged panels with Claudin-5 and ZO1. Yellow arrowheads point to normal junctions. TJ strands have many gaps (G, white arrowhead) or protrusions (P, white arrowhead) in mice with multiple GAS inoculations (panels G-I). (J) Bar graph comparing the fraction of aberrant TJs with gaps (blue bars) or protrusions (red bars) in naive, primary or multiple GAS inoculations. Panels K-N show low-magnification images of the OB sections with biocytin-TMR leakage and IgG deposition. Data were

1159 collected from 10 independent sections per animal from n = 3 animals/group and presented as mean  $\pm$   
1160 s.e.m, \*\*\*\*p<0.001, one-way ANOVA with Tukey's multiple post hoc comparison. Scale bars (A-I) =  
1161 15  $\mu$ m and (K-N) = 250  $\mu$ m.

1162

1163

1164

1165

1166

1167

1168

1169

1170

1171

1172

1173

1174

1175

1176

1177

1178

1179

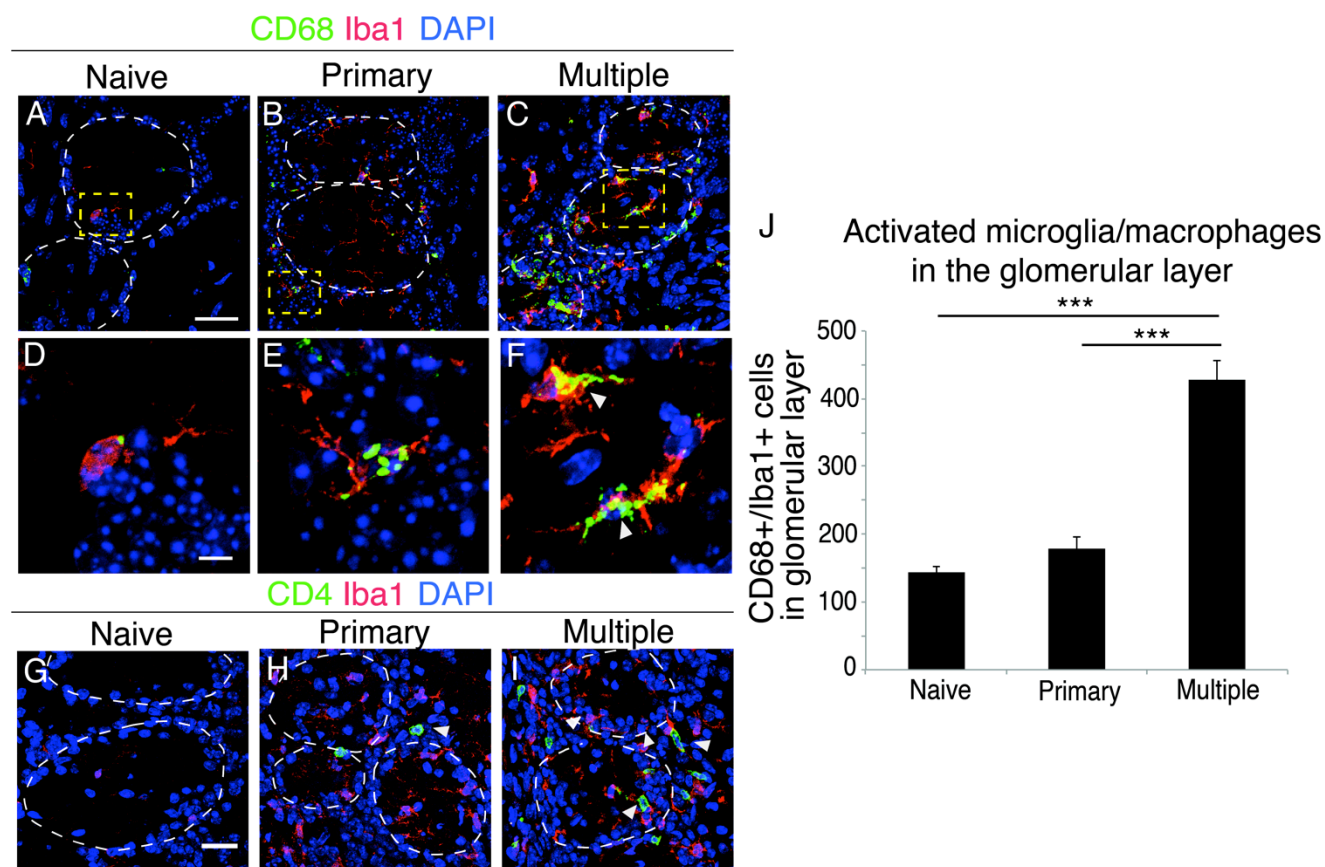

1180

1181 **Supplemental Figure 7. T cell homing into the brain is associated with microglia activation.** (A-F)

1182 Representative images of activated microglia (CD68<sup>+</sup> Iba1<sup>+</sup> double positive cells; yellow) in the OBs

1183 from naive, singly or multiply GAS-inoculated mice. Glomeruli are outlined with dashed white lines.

1184 The yellow dashed boxes show the region in images D-F. (G-I) Microglia (Iba1<sup>+</sup>; red) are in close

1185 proximity to CD4<sup>+</sup> T cells (green). (G) Bar graph showing the number of activated microglia (CD68<sup>+</sup>

1186 Iba1<sup>+</sup>) in 12 μm sections of glomeruli from naive, singly or multiply GAS-inoculated mice. Data were

1187 collected from multiple sections of n = 3-4 animals per group (stained 3 independent times) and

1188 presented as mean ± s.e.m. \*\*p<0.001, \*\*\*p<0.0001, one-way ANOVA with Tukey's multiple post hoc

1189 comparison. Scale bars (A-C; G-I) = 50 μm and (D-F) = 10 μm.
